# Supplementary material
Source: PubMed Central journal article supplement (PMC5889338)

**Figure S1**

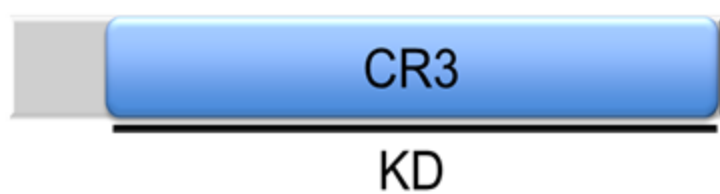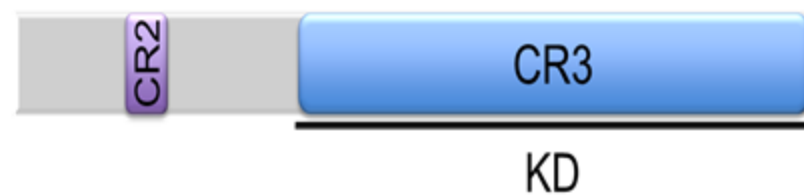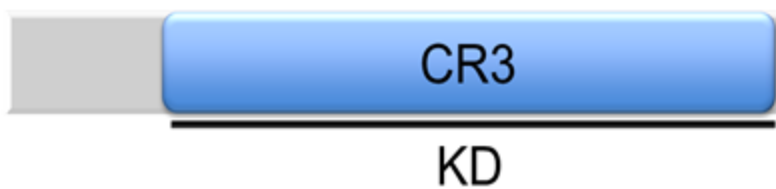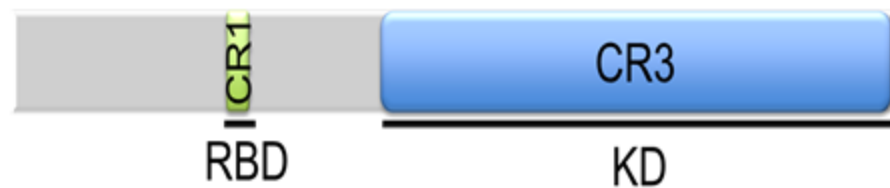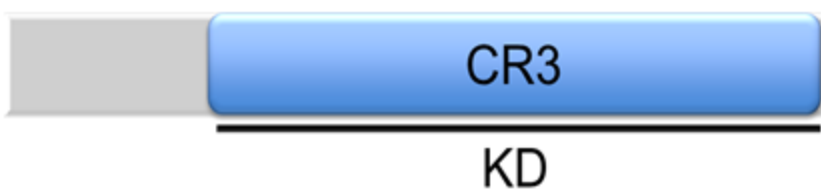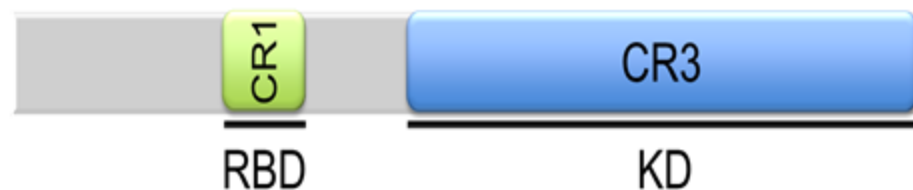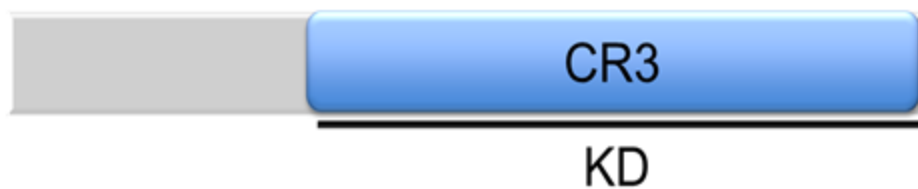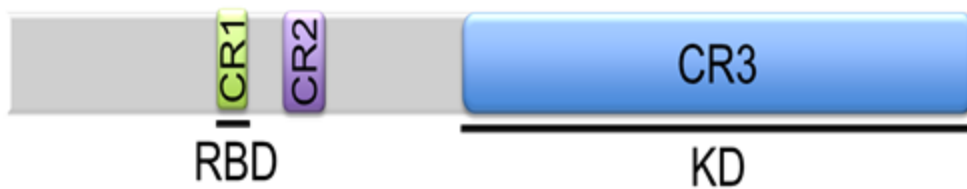

# Supplementary Figure 2A

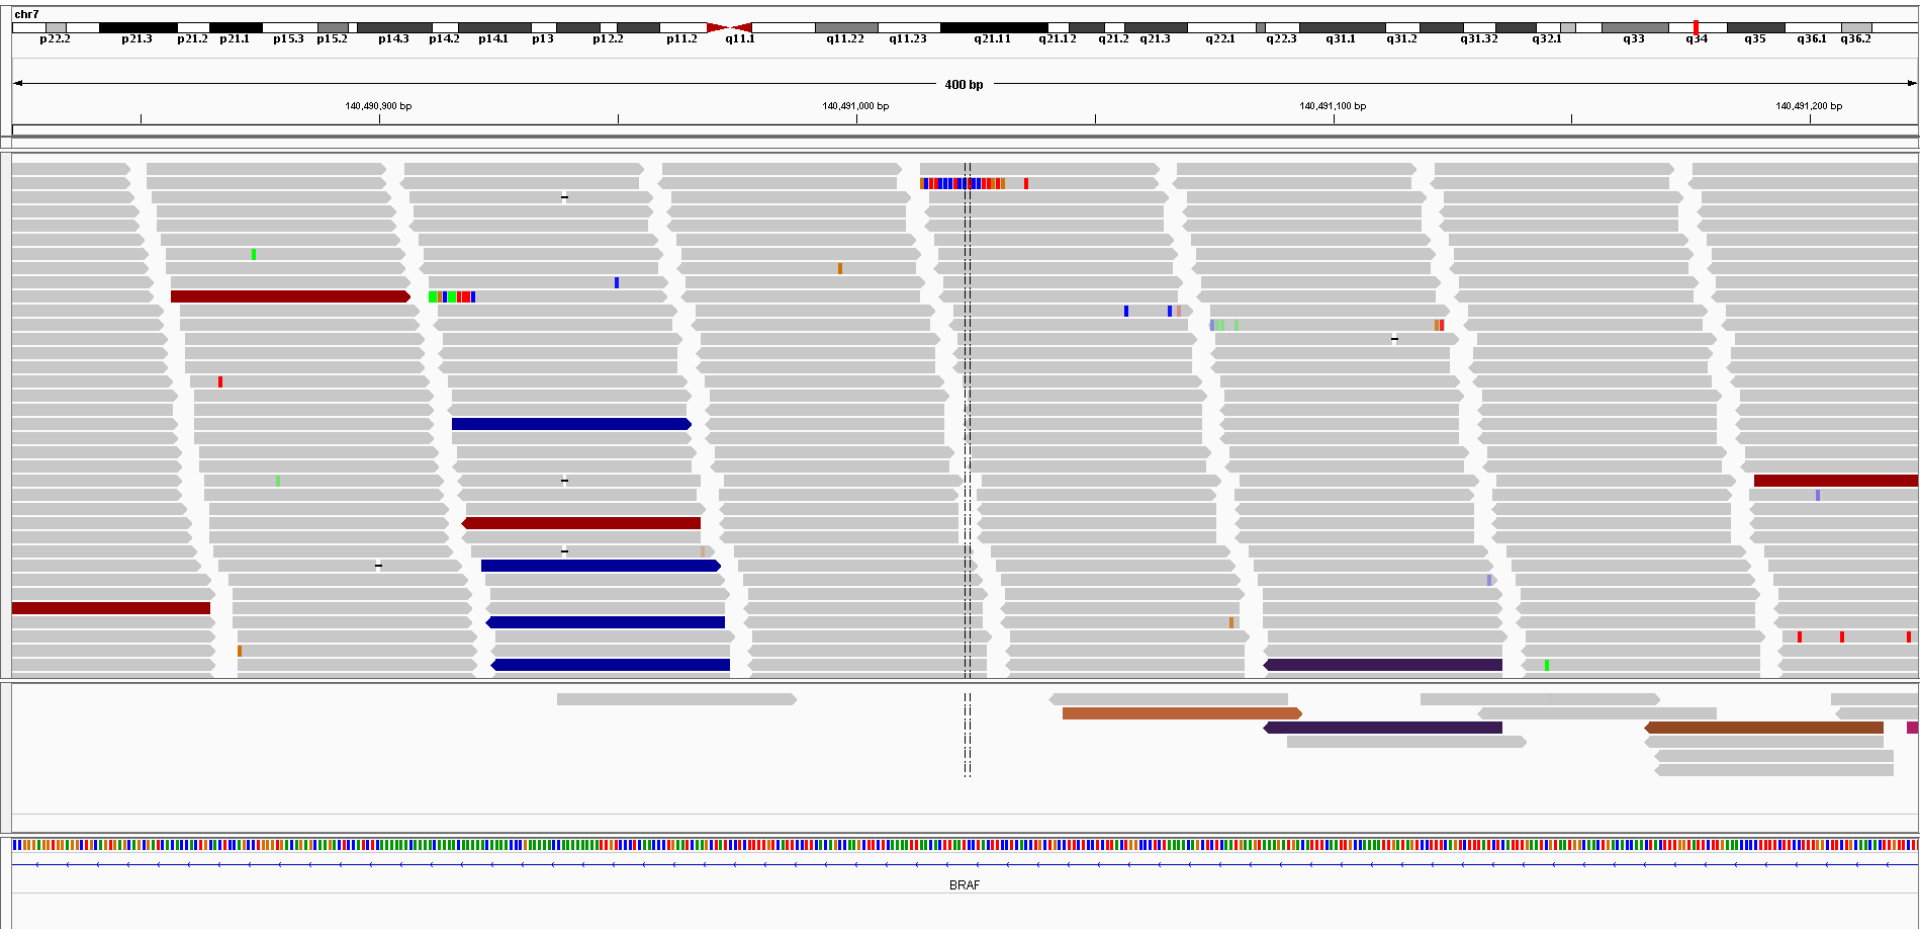

# Supplementary Figure 2B

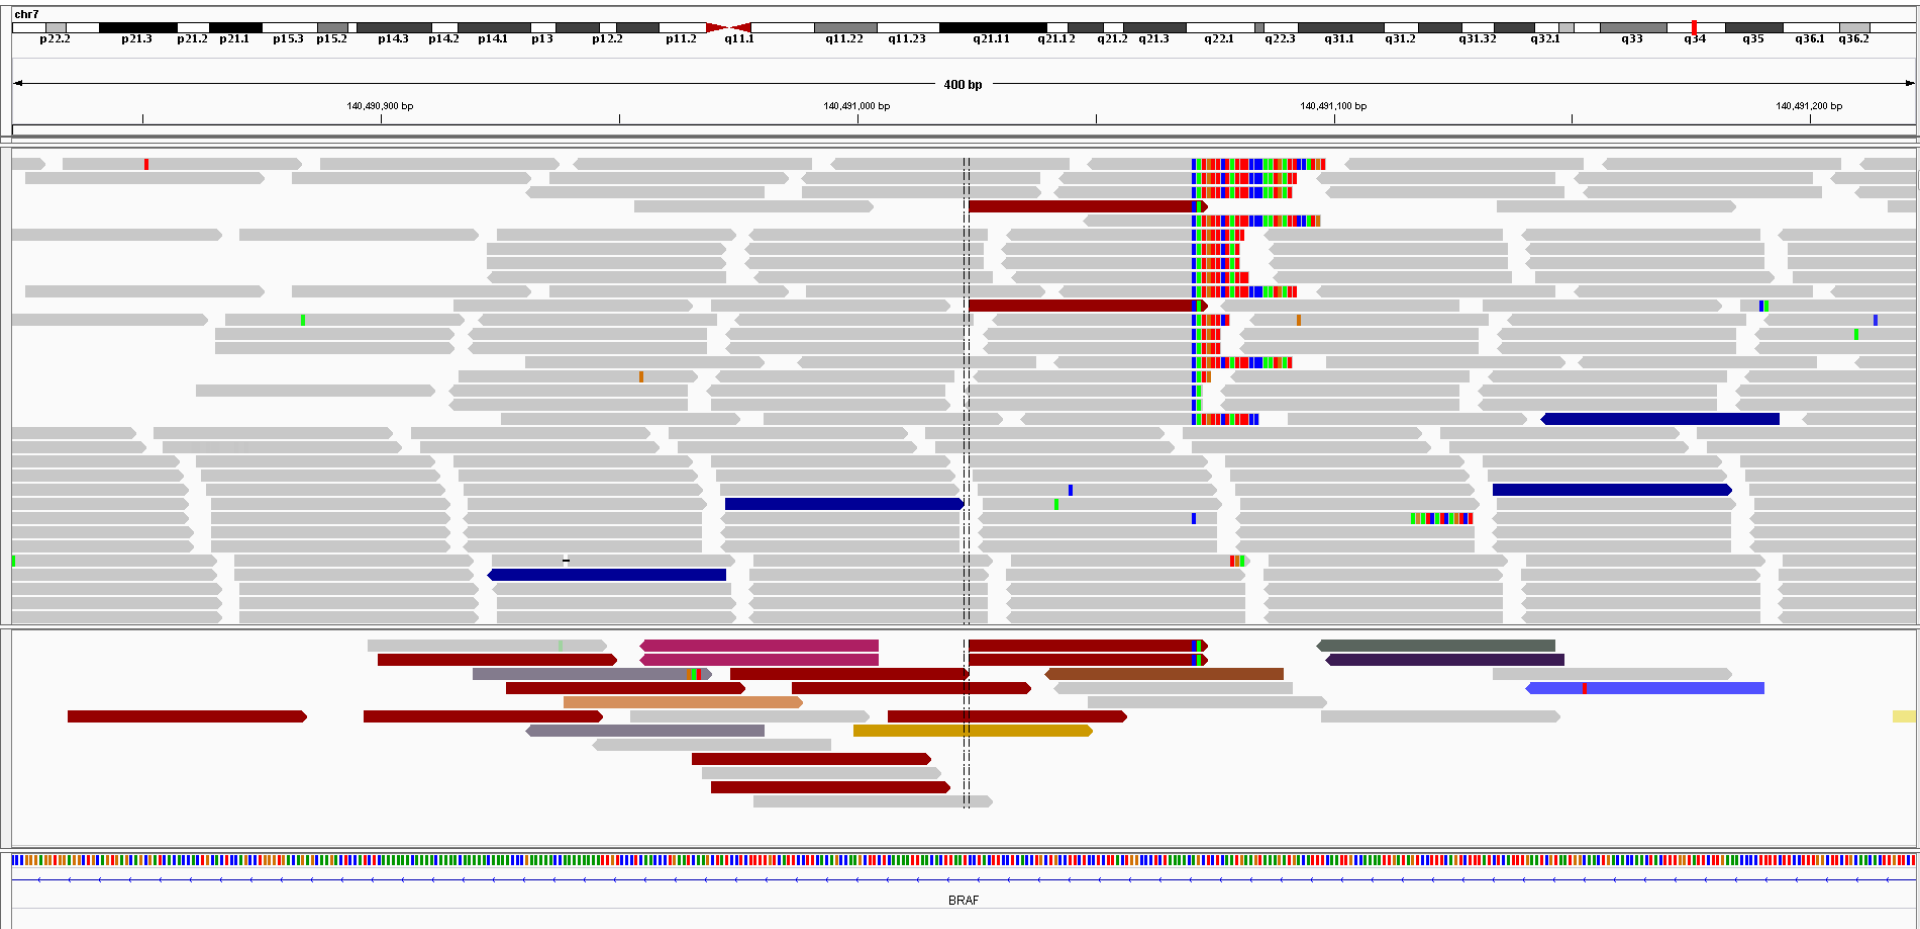

# Supplementary Figure 2C

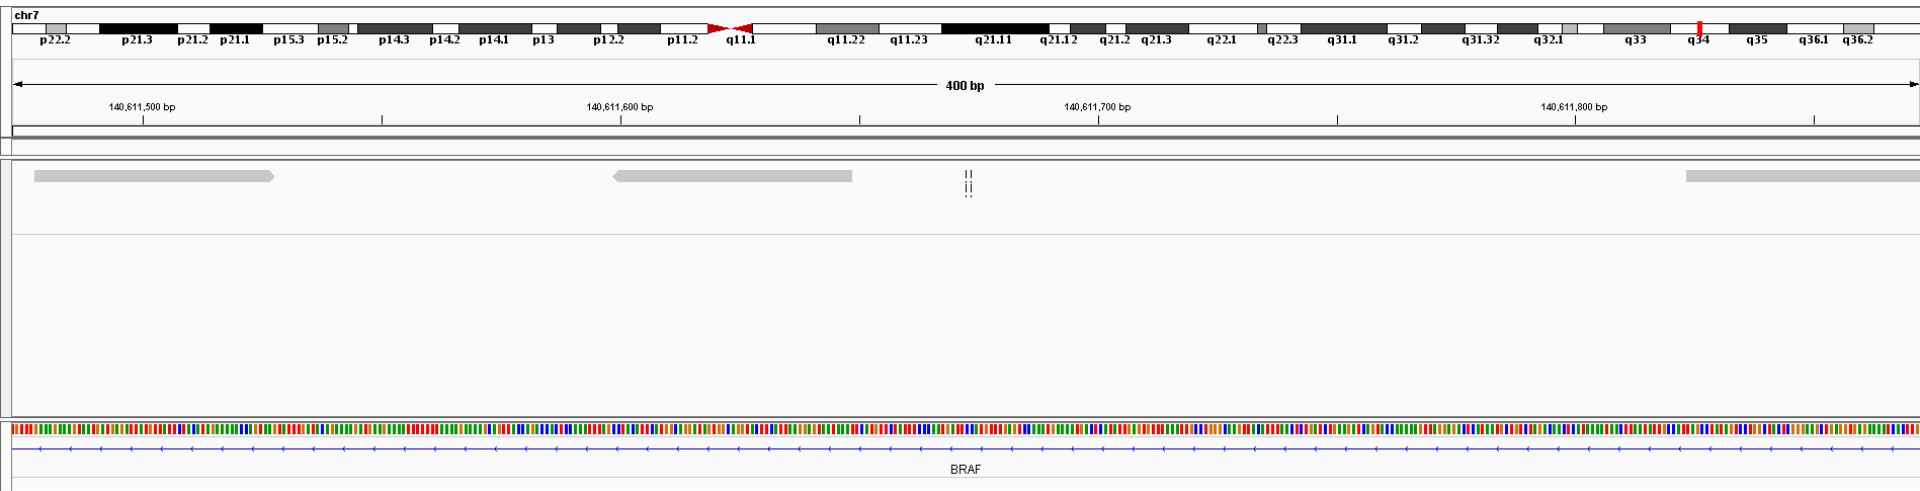

# Supplementary Figure 2D

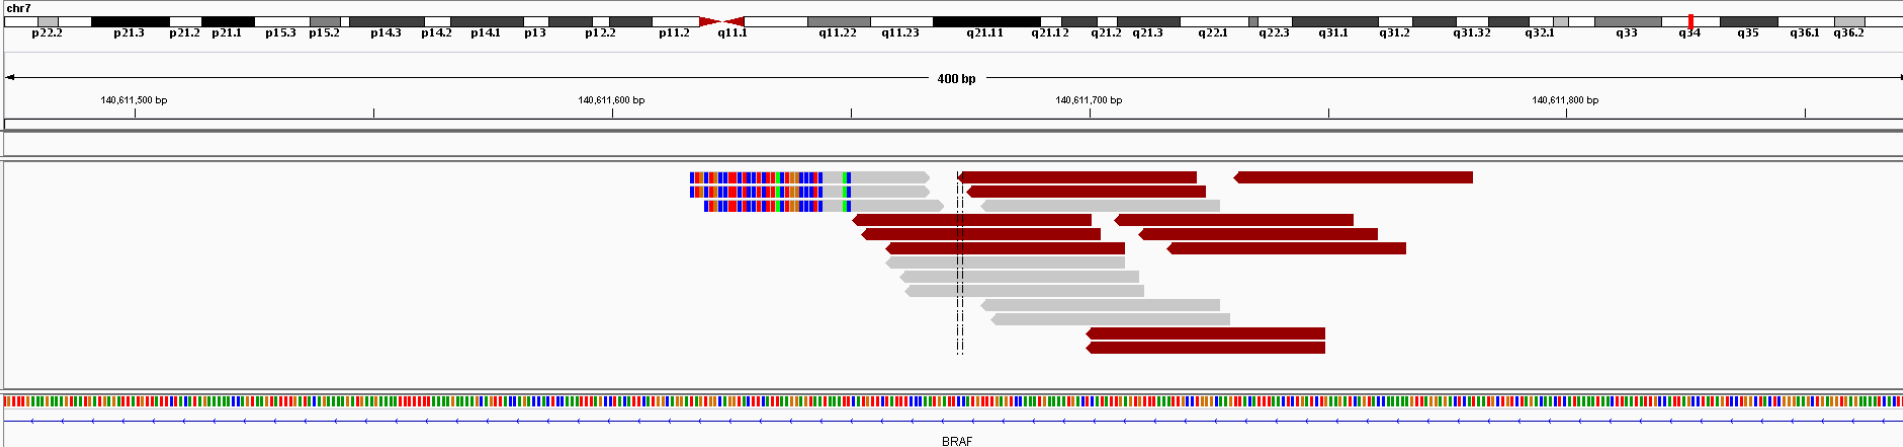

Supplement: NIHMS950637-supplement-Sup_Figures.pdf [file NIHMS950637-supplement-Sup_Figures.pdf]
